# Supplementary material
Source: PubMed Central journal article supplement (PMC5945206)
Supplement: NIHMS942385-supplement-2.pdf [file NIHMS942385-supplement-2.pdf]

A

A: Control strain (no IAPP)  
 B: IAPP + empty vector  
 C: IAPP + suppressor

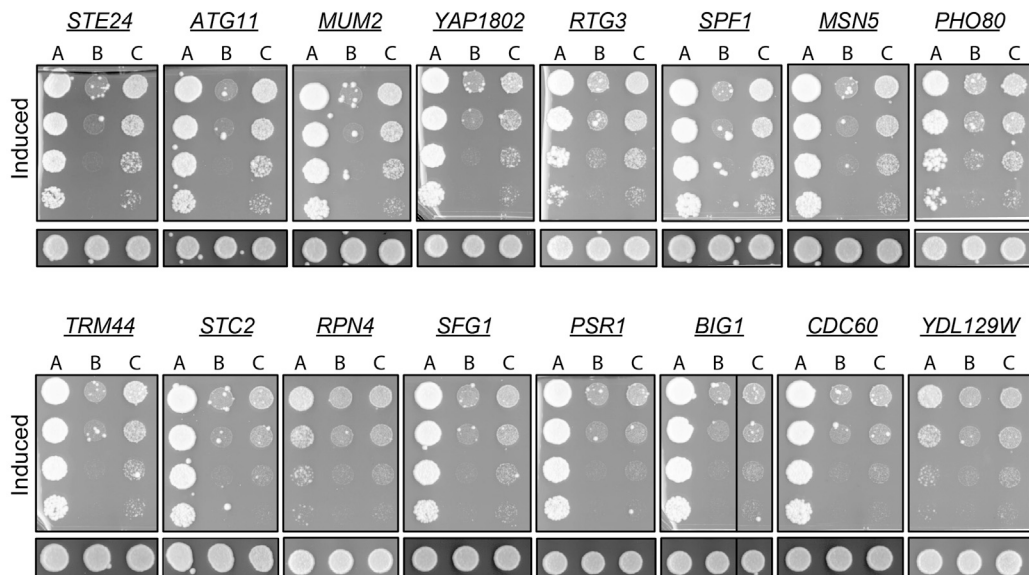

B

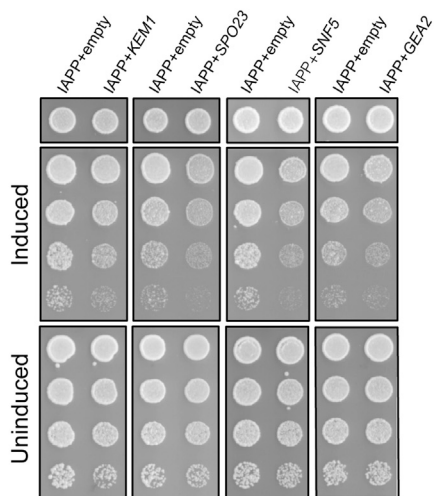

**Figure S2. Validation of Modifiers Recovered from the Overexpression Screen, Related to Figure 2A**

(A) Spotting assays demonstrating representative verification data for 6xIAPP suppressors identified in the overexpression screen. Strains were diploid W303 and contain two copies of 6xIAPP. Strains were grown for 48 hours on the indicated media, with the exception of Rpn4 and Ydl129W, which were grown for 24 hours. (B) Spotting assays demonstrating verification data for the 6xIAPP enhancers identified in the overexpression screen. Strains were diploid W303 containing one copy of 6xIAPP and grown for 48 hours on the indicated media.
