# Supplementary material
Source: PubMed Central journal article supplement (PMC5945206)
Supplement: NIHMS942385-supplement-5.pdf [file NIHMS942385-supplement-5.pdf]

**Table S1. IAPP overexpression suppressors. Related to Figure 2.** The verified suppressors recovered from the genome-wide overexpression screen.

| <b>Rank</b> | <b>Systematic name</b> | <b>Standard Name</b> | <b>Brief Description</b>                                               |
|-------------|------------------------|----------------------|------------------------------------------------------------------------|
| 1           | YJR117W                | STE24                | Highly conserved zinc metalloprotease                                  |
| 2           | YPR049C                | ATG11                | Adapter protein for pexophagy and the Cvt targeting pathway            |
| 3           | YBR057C                | MUM2                 | Protein essential for meiotic DNA replication and sporulation          |
| 4           | YGR241C                | YAP1802              | Protein of the AP180 family, involved in clathrin cage assembly        |
| 5           | YBL103C                | RTG3                 | bHLH/Zip transcription factor for retrograde (RTG) and TOR pathways    |
| 6           | YEL031W                | SPF1                 | P-type ATPase, ion transporter of the ER membrane                      |
| 7           | YDR335W                | MSN5                 | Karyopherin                                                            |
| 8           | YOL001W                | PHO80                | Cyclin                                                                 |
| 9           | YPL030W                | TRM44                | tRNA(Ser) Um(44) 2'-O-methyltransferase                                |
| 10          | YOR081C                | TGL5                 | Bifunctional triacylglycerol lipase and LPA acyltransferase            |
| 11          | YDL020C                | RPN4                 | Transcription factor that stimulates expression of proteasome genes    |
| 12          | YOR315W                | SFG1                 | Nuclear protein putative transcription factor                          |
| 13          | YLL010C                | PSR1                 | Plasma membrane associated protein phosphatase                         |
| 14          | YHR101C                | BIG1                 | Integral membrane protein of the endoplasmic reticulum                 |
| 15          | YPL160W                | CDC60                | Cytosolic leucyl tRNA synthetase                                       |
| 16          | YDL129W                |                      | Protein of unknown function                                            |
| 17          | YOR067C                | ALG8                 | Glucosyl transferase                                                   |
| 18          | YPL014W                | CIP1                 | Cyclin-dependent kinase inhibitor                                      |
| 19          | YBL051C                | PIN4                 | Protein involved in G2/M phase progression and response to DNA damage  |
| 20          | YJL089W                | SIP4                 | C6 zinc cluster transcriptional activator                              |
| 21          | YOR083W                | WHI5                 | Repressor of G1 transcription                                          |
| 22          | YLR423C                | ATG17                | Scaffold protein responsible for phagophore assembly site organization |
| 23          | YNL186W                | UBP10                | Ubiquitin-specific protease, deubiquitinates Ub-protein moieties       |
| 24          | YLR082C                | SRL2                 | Protein of unknown function                                            |
| 25          | YKL204W                | EAP1                 | eIF4E-associated protein, competes with eIF4G for binding to eIF4E     |
| 26          | YEL043W                |                      | Predicted cytoskeleton protein involved in intracellular signaling     |
| 27          | YDR227W                | SIR4                 | SIR protein involved in assembly of silent chromatin domains           |
| 28          | YDL175C                | AIR2                 | RNA-binding subunit of the TRAMP nuclear RNA surveillance complex      |
| 29          | YKL214C                | YRA2                 | Member of the REF (RNA and export factor binding proteins) family      |
